# Supplementary material for: Integrated Analysis Reveals S100a8/a9 Regulates Autophagy and Apoptosis through the MAPK and PI3K-AKT Signaling Pathway in the Early Stage of Myocardial Infarction
Source: MDPI journal article supplement (doi:10.3390/cells11121911), 2022-06-13
Supplement: s1 [file s1]

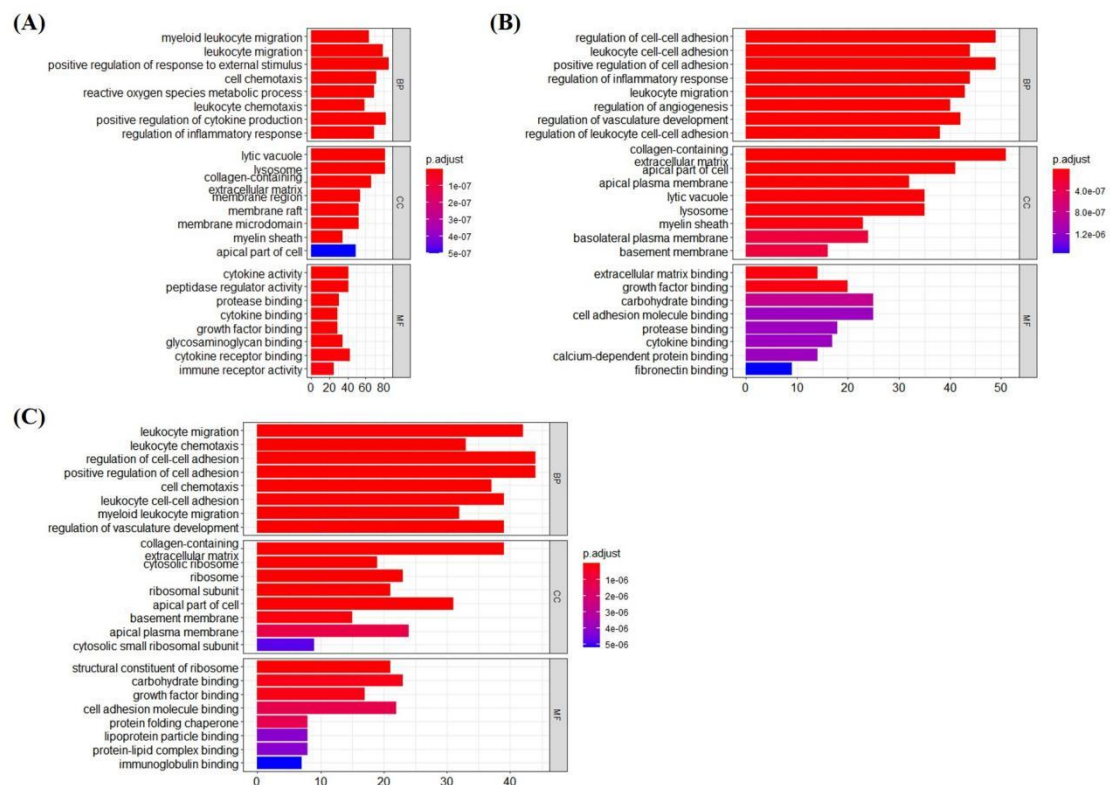

**Figure S1: Gene ontology analysis of DEGs at each time point in scRNA-seq data.**

(A), (B), (C) are bar graphs of GO analysis of significant DEGs on days 1, 3, and 7 post MI, respectively. BP: Biological Process, CC: Cellular Components, MF: Molecular Function, only the first 8 items are displayed in each column.

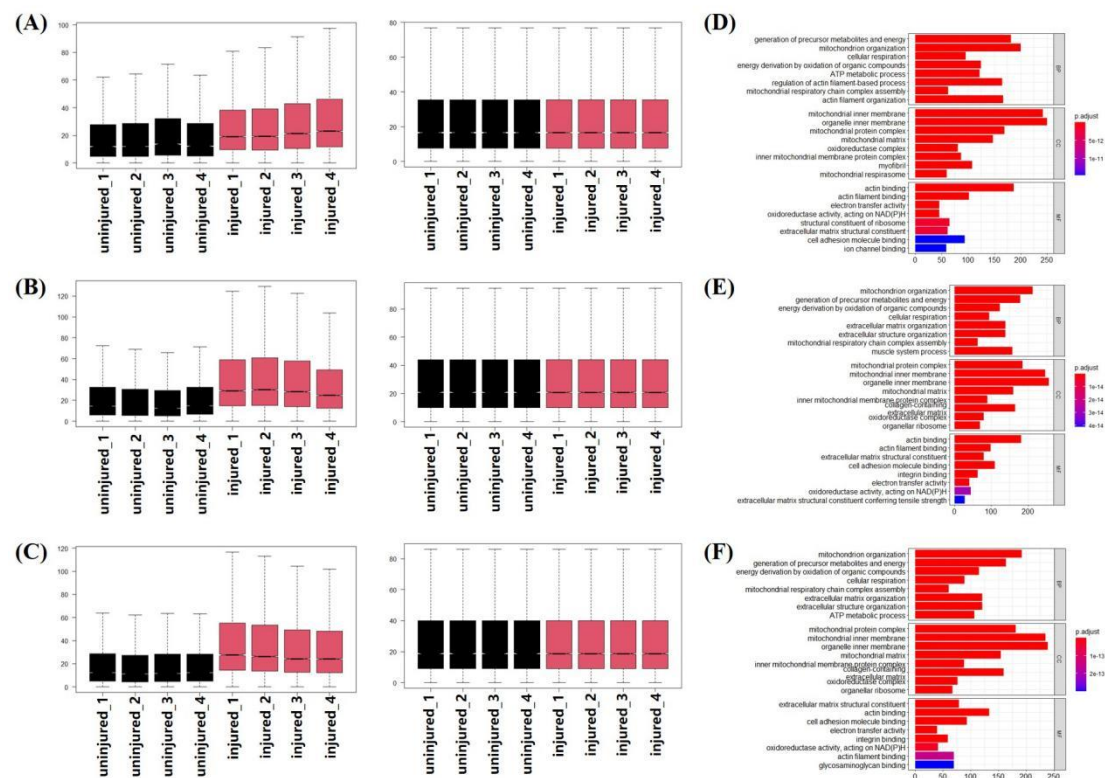

**Figure S2: mRNA-seq data processing results.** (A) is the comparison before and after normalization of mRNA-seq data on day 3 post MI, (B) represents day 7 post MI, (C) represents day 14 after MI. Black is the control group, red is the MI group, n=4. (D), (E), (F) are bar graphs of GO analysis of significant DEGs on days 3, 7, and 14 post MI, respectively. only the first 8 items are displayed in each column.
